# Supplementary material for: Synthesis and properties of highly branched polybenzimidazoles as proton exchange membranes for high-temperature fuel cells
Source: Royal Society of Chemistry journal article supplement (doi:10.1039/c6tc00862c), 2016-01-01
Supplement: c6tc00862c1.pdf [file c6tc00862c1.pdf]

## Supporting information

### Synthesis and properties of highly branched polybenzimidazoles as proton exchange membranes for high-temperature fuel cells

Jiangpeng Ni<sup>a</sup>, Meishao Hu<sup>a</sup>, Dong Liu<sup>a</sup>, Huixiong Xie<sup>a</sup>, Xiongzhi Xiang<sup>a,b,\*</sup>,

Lei Wang<sup>a,b,\*</sup>

<sup>a</sup> Shenzhen Key Laboratory of Polymer Science and Technology, College of Materials

Science and Engineering, Shenzhen University, Shenzhen 518060, China

<sup>b</sup> Guangdong Research Center for Interfacial Engineering of Functional Materials,

Shenzhen University, Shenzhen 518060, China

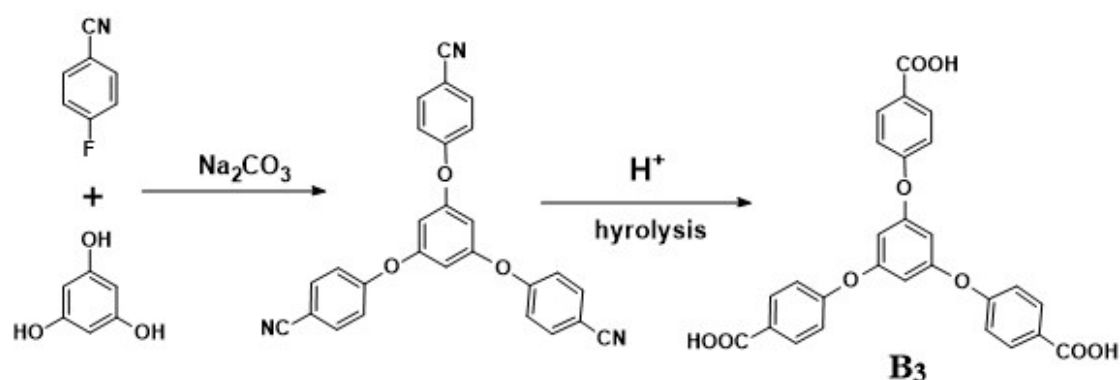

**Scheme. S1.** Synthesis route for 1,3,5-tri(4-carboxyphenoxy)benzene (B<sub>3</sub>).

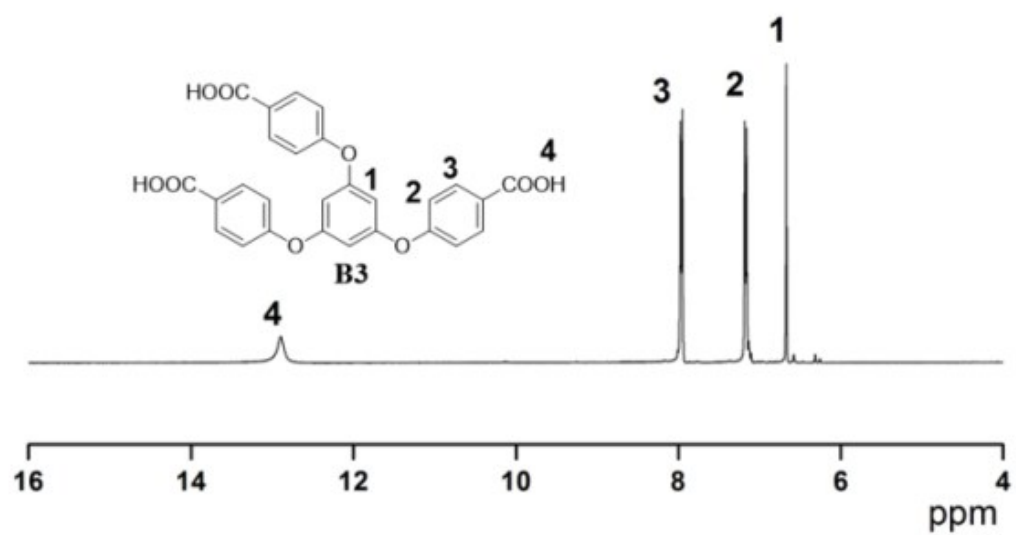

Fig. S1. <sup>1</sup>H NMR spectrum of B<sub>3</sub>.
